# Supplementary material for: Associations between genetic variants of Toll-interacting proteins and interstitial lung diseases: a systematic review and meta-analysis
Source: PubMed Central journal article supplement (PMC11583435; doi:10.1186/s13023-024-03410-8), 2024-11-22
Supplement: 13023_2024_3410_MOESM5_ESM.pdf [file 13023_2024_3410_MOESM5_ESM.pdf]

- 1 Lung Diseases, Interstitial
- 2 Pulmonary Fibrosis
- 3 interstitial and lung and disease
- 4 interstitial and fibrosis or pneumonitis or pneumonia or pneumopathy
- 5 diffuse and parenchymal
- 6 alveolitis
- 7 Bronchiolitis Obliterans or bronchiolitis and obliterans
- 8 good pasture and syndrome
- 9 granulomatosis
- 10 Histiocytosis or histiocytosis
- 11 Pneumoconiosis is or pneumoconiosis.
- 12 bagassosis
- 13 pulmonary and sarcoid
- 14 pulmonary and fibrosis
- 15 Wegener and granuloma
- 16 lung and purpura
- 17 bird or farmer or pigeon or avian or budgerigar and lung or disease
- 18 asbestosis or byssinosis or siderosis or silicosis or berylliosis or anthracosilicotic or silicotuberculosis
- 19 1 or 2 or 3 or 4 or 5 or 6 or 7 or 8 or 9 or 10 or 11 or 12 or 13 or 14 or 15 or 16 or 17 or 18
- 20 Scleroderma, Systemic
- 21 sclerodermas
- 22 Rheumatic Diseases
- 23 rheumatics
- 24 20 or 21 or 22 or 23
- 25 lung or pulmonary or respiratory
- 26 24 and 25
- 27 19 or 26
- 28 TOLLIP protein
- 29 tolls interacting protein
- 30 Toll-interacting protein
- 31 28 or 29 or 30
- 32 tollip
- 34 31 or 32
- 35 27 and 34
